# Supplementary material for: Lithium transference in electrolytes with star-shaped multivalent anions measured by electrophoretic NMR
Source: Royal Society of Chemistry journal article supplement (doi:10.1039/d3cp00923h), 2023-01-01
Supplement: d3cp00923h1.pdf [file d3cp00923h1.pdf]

## **Lithium Transference in Electrolytes with Star-Shaped Multivalent Anions Measured by Electrophoretic NMR**

Saheli Chakraborty\*,<sup>1,2,3</sup> David M. Halat\*,<sup>1,2,3</sup> Julia Im,<sup>2</sup> Darby T. Hickson,<sup>1,2</sup> Jeffrey A. Reimer,<sup>1,2,3</sup> Nitash P. Balsara<sup>1,2,3</sup>

1. Materials Sciences Division, Lawrence Berkeley National Laboratory, Berkeley, California 94720, United States
2. Department of Chemical and Biomolecular Engineering, University of California, Berkeley, Berkeley, California 94720, United States
3. Joint Center for Energy Storage Research (JCESR), Lawrence Berkeley National Laboratory, Berkeley, California 94720, United States

\* Both the authors contributed equally

## Calculation of the fraction of fully dissociated ion, $f$

From the discussion surrounding Equation 17 in the main text, we know that

$$v_+ = f v_{f+} + (1-f)v_-$$

where  $f$  is the fraction of fully dissociated ions moving freely under the electric field in the  $+x$  direction with a velocity of  $v_{f+}$ , while the remainder are tightly coordinated with the anions and migrate with anions in the  $-x$  direction with velocity  $v_-$ .

Thus, assuming the solvent velocity  $v_0$  to be zero, which is a reasonable assumption for the present system,  $t_+^0$  can be written as

$$t_+^0 = \frac{f v_{f+} + (1-f)v_-}{f v_{f+} + (1-f)v_- - v_-}$$

Rearranging the above equation we obtain

$$v_{f+} = \frac{t_+^0 + \left(\frac{1-f}{f}\right)}{t_+^0 - 1} v_- \quad (19)$$

Thus,  $v_{f+} > 0$  defines an upper bound for  $f$ , i.e., we arrange Equation 19 to obtain the inequality  $f_{thresh} < \frac{1}{1-t_+^0}$ . The value of  $f_{thresh}$  provides the maximum possible fraction of fully dissociated ions assuming the present model.

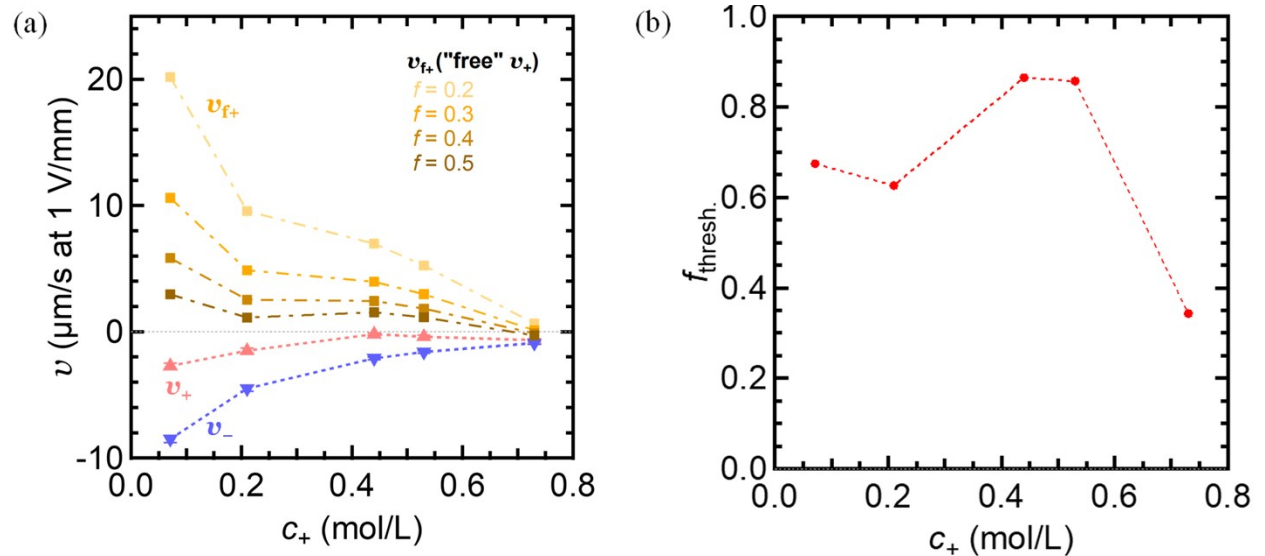

Figure S1. (a) Using  $\nu^-$  and  $t_+^0$  from eNMR and assuming different values of  $f$ , values of  $\nu_{f+}$  (represented by orange squares) are calculated. For instance, at all concentrations (except the most highly concentrated sample), even if only 50% of cations are fully dissociated, values of  $\nu_{f+}$  remain positive, as expected. (b)  $f_{thresh}$  plotted against  $c_+$ .  $f_{thresh}$  is a weak function of  $c_+$ , but is found to decrease with  $c_+$  at the highest salt concentration. For example, at 0.4 M,  $f_{thresh} = 0.86$  implies that our model is consistent with 14% or more of the cations being tightly coordinated with the anions. In other words, in principle only a small fraction ( $\sim 15\%$ ) of the cations need to be coordinated with anions to obtain a negative  $\nu_+$ .
